# Supplementary material for: MACl enhanced electron extraction in all-inorganic Cs2AgBiBr6 perovskite photovoltaics
Source: Royal Society of Chemistry journal article supplement (doi:10.1039/d2cc06432d), 2023-01-01
Supplement: d2cc06432d1.pdf [file d2cc06432d1.pdf]

## Supplementary Materials

### Experimental Section

#### Materials

Titanium tetrachloride( $\text{TiCl}_4$ , 99.9%), Tetrabutyl titanate (98%) were acquired from Sinopharm Chemical Reagent Co., Ltd. Methylammonium Chloride( $\text{MACl}$ ,  $\geq 99.5\%$ ), methylammonium bromide ( $\text{MABr}$ ,  $\geq 99.5\%$ ), Methylammonium Iodide( $\text{MAI}$ ,  $\geq 99.5\%$ ) were purchased from Xi'an Polymer Light Technology Corp. Caesium bromide ( $\text{CsBr}$ , 99.5%), Silver bromide ( $\text{AgBr}$ , 98%), Bismuth(III) bromide ( $\text{BiBr}_3$ ,  $\geq 98\%$ ), dimethylsulfoxide (DMSO) and chlorobenzene (CB) were obtained from Macklin. All chemicals were used without further purification.

#### Device fabrication

The  $\text{TiO}_2$  dense layer was obtained by thermal deposition at  $70^\circ\text{C}$  in water bath with 0.1M  $\text{TiCl}_4$  solution. After annealing at  $450^\circ\text{C}$ , it was put into the tank of the reaction kettle containing tetrabutyl titanate solution to react with 110 minutes.  $\text{TiO}_2$  nanorods were prepared by annealing at  $450^\circ\text{C}$  for 30 minutes. The concentration of  $\text{Cs}_2\text{AgBiBr}_6$  precursor solution is 0.5M.  $\text{CsBr}$ ,  $\text{AgBr}$  and  $\text{BiBr}_3$  were added to DMSO at a molar mass of 2:1:1 and stirred at  $70^\circ\text{C}$  for more than 10 hours. Double perovskite precursor solution was obtained after filtration. The FTO/ $\text{TiO}_2$  substrate was preheated to 10 minutes at  $70^\circ\text{C}$  and then spin-cast by perovskite precursor solution followed by spin-coating of antisolvent CB. After annealing at  $280^\circ\text{C}$  for 10 minutes,  $\text{Cs}_2\text{AgBiBr}_6$  perovskite films were obtained. As for  $\text{Cs}_2\text{AgBiBr}_6$ -MAX, MAX solution was spin-cast before spin-coating of perovskite precursor solution. The concentration ratio of perovskite precursor/MAX is set at 2:1. After finishing the growth of

TiO<sub>2</sub> NRs, 0.25M-MAX solution was spin-coated in advance on the TiO<sub>2</sub> ETL followed by spin-coating Cs<sub>2</sub>AgBiBr<sub>6</sub> precursor. 0.25mmol MAcl, MABr and MAI were dissolved separately in DMSO to prepare MAX solution. The entire preparation procedure of Cs<sub>2</sub>AgBiBr<sub>6</sub> film was carried out in airing chamber. The low temperature carbon paste was coated on the perovskite layer by screen printing, and heat-treated at 100°C for 10 minutes to obtain carbon based electrode. The active area of the device is ~0.06cm<sup>2</sup>.

### **Characterization**

Crystalline structures were tested by an X-Ray Diffractometer (XRD, Brucker D8). The top-view and cross-sectional morphologies were investigated by SEM (JEOL JSM-7100F). The chemical bonding was recorded by XPS spectrometer (Thermo scientific, ESCALab 250xi). The absorption curves were collected by a UV–vis-NIR spectrophotometer (UV-3600, Shimadzu). The photoluminescence spectroscopy measurements were measured with a fluorescence spectrophotometer (FLS 1000). The Fourier transform infrared (FTIR) spectra were obtained by Vacuum Fourier Transform Infrared Spectroscopy of Brooke Company in Germany (VERTEX 70v). The J-V curves of PeSCs were finished with the American Newport Oriol test system (forward scan parameters: 1.5V to 0V, step length 0.02V; reverse scan parameters: 0V to 1.5V, step length 0.02V). The sunlight intensity was calibrated with a certified reference silicon solar cell. The EQE was measured by Keithley 2400 source meter and solar simulator (Newport 67005) under standard AM 1.5G illumination. The EIS measurement was conducted by an electrochemical station (CHI760e).

## Supporting tables

**Table S1** PL decay parameters of TiO<sub>2</sub>/ Cs<sub>2</sub>AgBiBr<sub>6</sub> films.

| Samples   | A <sub>1</sub> | τ <sub>1</sub> (ns) | A <sub>2</sub> | τ <sub>2</sub> (ns) | τ     |
|-----------|----------------|---------------------|----------------|---------------------|-------|
| Reference | 0.996          | 45.83               | 0.035          | 166.34              | 59.46 |
| MACl      | 0.699          | 1.74                | 0.281          | 46.34               | 42.53 |
| MABr      | 0.530          | 3.25                | 0.402          | 52.25               | 48.53 |
| MAI       | 0.646          | 2.43                | 0.359          | 48.81               | 45.00 |

TRPL spectra of TiO<sub>2</sub>/ Cs<sub>2</sub>AgBiBr<sub>6</sub> films were fitted by the following formula<sup>[1]</sup>.

$$y = y_0 + A_1 e^{-\left(\frac{x}{\tau_1}\right)} + A_2 e^{-\left(\frac{x}{\tau_2}\right)} \quad (1)$$

Where τ<sub>1</sub> and τ<sub>2</sub> are the fast decay time related to defects and slow decay time related to bimolecular recombination, respectively, and A<sub>1</sub> and A<sub>2</sub> are amplitudes. The carrier recombination lifetime (τ) was calculated by the formula:

$$\tau = \frac{A_1 \tau_1^2 + A_2 \tau_2^2}{A_1 \tau_1 + A_2 \tau_2} \quad (2)$$

**Table S2** Photovoltaic parameters of the best Cs<sub>2</sub>AgBiBr<sub>6</sub> PeSCs with and without MAX pre-treatment.

| <b>Cs<sub>2</sub>AgBiBr<sub>6</sub> Samples</b> | <b>Voc (V)</b> | <b>Jsc(mA cm<sup>-2</sup>)</b> | <b>FF (%)</b> | <b>PCE (%)</b> | <b>HI</b> |
|-------------------------------------------------|----------------|--------------------------------|---------------|----------------|-----------|
| FW                                              | 1.10           | 2.17                           | 45            | 1.08           |           |
| <b>Reference</b> RE                             | 1.06           | 2.29                           | 50            | 1.20           | 0.17      |
| Ave.                                            | 1.05±0.05      | 1.92±0.44                      | 46±5.48       | 1.01±0.19      |           |
| FW                                              | 1.09           | 3.05                           | 59            | 1.96           |           |
| <b>MACl</b> RE                                  | 1.07           | 3.04                           | 62            | 2.03           | 0.05      |
| Ave.                                            | 1.06±0.05      | 2.94±0.11                      | 60±3.43       | 1.92±0.11      |           |
| FW                                              | 1.06           | 2.34                           | 59            | 1.46           |           |
| <b>MABr</b> RE                                  | 1.01           | 2.57                           | 59            | 1.55           | 0.12      |
| Ave.                                            | 1.07±0.06      | 2.29±0.25                      | 53±6.97       | 1.34±0.21      |           |
| FW                                              | 1.05           | 2.51                           | 62            | 1.66           |           |
| <b>MAI</b> RE                                   | 1.03           | 2.79                           | 63            | 1.80           | 0.11      |
| Ave.                                            | 1.08±0.07      | 2.66±0.14                      | 59±4.18       | 1.51±0.29      |           |

**Table S3** Rs, Rct and C fitted by nyquist EIS diagram.

| <b>Sample</b>    | <b>Rs(KΩ)</b> | <b>Rct(KΩ)</b> | <b>C(F)</b> |
|------------------|---------------|----------------|-------------|
| <b>Reference</b> | 76.34         | 1.993          | 4.004E-8    |
| <b>MACl</b>      | 70.05         | 1.272          | 2.940E-8    |
| <b>MABr</b>      | 71.23         | 1.507          | 5.275E-9    |
| <b>MAI</b>       | 71.78         | 1.360          | 4.242E-8    |

**Table S4** Rsh, Rs and J<sub>0</sub> derived from dark J-V curves

| Sample    | Rsh( $\Omega \text{ cm}^2$ ) | Rs( $\Omega \text{ cm}^2$ ) | lnJ <sub>0</sub> | J <sub>0</sub> (mA cm <sup>-2</sup> ) |
|-----------|------------------------------|-----------------------------|------------------|---------------------------------------|
| Reference | 7.07E7                       | 71.38                       | -10.41           | 3.01E-5                               |
| MACl      | 6.85E6                       | 94.76                       | -13.60           | 1.24E-6                               |
| MABr      | 2.06E6                       | 92.69                       | -11.40           | 1.12E-5                               |
| MAI       | 1.60E6                       | 84.47                       | -12.47           | 3.84E-6                               |

The dark current fitting of the device was according to the following formula <sup>[2, 3]</sup>.

$$-\frac{dV}{dJ} = \frac{AK_B T}{e} \frac{1}{(J_{sc} - J)} + R_s \quad (3)$$

$$\ln(J_{sc} - J) = \frac{e}{AK_B T}(V + R_s * J) + \ln J_0 \quad (4)$$

Here A is the ideal factors of the diode, R<sub>S</sub> is the series resistance, R<sub>SH</sub> is the shunt resistance, and J<sub>0</sub> reverse saturation current. K<sub>B</sub> is the Boltzmann constant, T is the absolute temperature, e is the basic charge, and V is the DC bias voltage applied to the cell.

**Table S5** Photovoltaic parameters of the champion devices stored within 30 days.

| Samples   | Days | V <sub>oc</sub> (V) | J <sub>sc</sub> (mA cm <sup>-2</sup> ) | FF (%) | PCE (%) |
|-----------|------|---------------------|----------------------------------------|--------|---------|
| Reference | 0    | 1.06                | 2.29                                   | 50     | 1.20    |
|           | 5    | 1.07                | 2.26                                   | 49     | 1.19    |
|           | 10   | 1.08                | 2.23                                   | 47     | 1.12    |
|           | 15   | 1.09                | 2.23                                   | 46     | 1.12    |
|           | 20   | 1.10                | 2.17                                   | 46     | 1.10    |
|           | 30   | 1.19                | 1.89                                   | 44     | 1.00    |
|           | MACl | 0                   | 1.07                                   | 3.04   | 62      |
| 5         |      | 1.09                | 2.99                                   | 61     | 2.01    |
| 10        |      | 1.15                | 2.99                                   | 58     | 2.00    |
| 15        |      | 1.13                | 3.00                                   | 58     | 1.97    |
| 20        |      | 1.13                | 2.98                                   | 57     | 1.93    |
| 30        |      | 1.22                | 2.61                                   | 58     | 1.85    |



## Supporting Figures

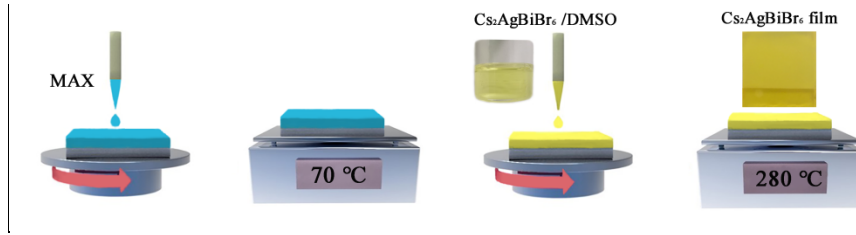

**Fig.S1** (a) Diagrammatic sketch for preparation process of  $\text{Cs}_2\text{AgBiBr}_6$  films with MAX pre-treatment (X is  $\text{Cl}^-$ ,  $\text{Br}^-$  and  $\text{I}^-$ ).

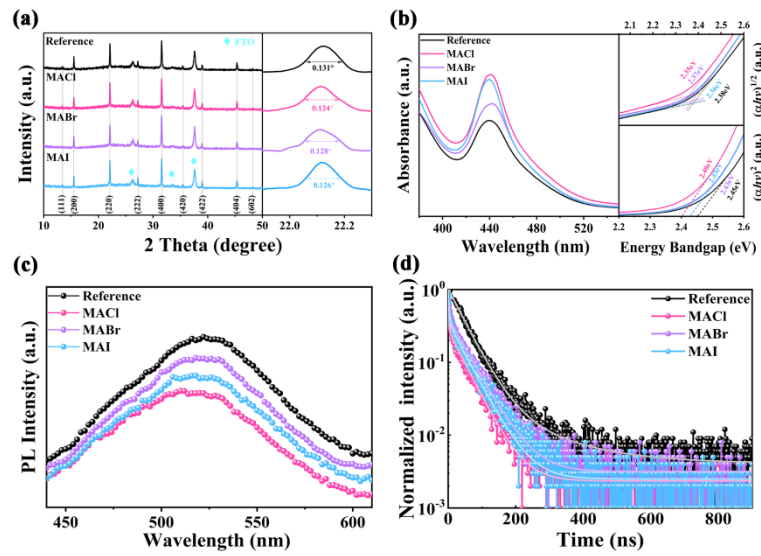

**Fig. S2** (a) XRD patterns and (220) diffraction peaks of perovskite films. The FWHM value is measured for (220) plane. (b) UV-vis absorption spectra of  $\text{Cs}_2\text{AgBiBr}_6$  perovskite films. (c) PL and (d)TRPL spectra of  $\text{Cs}_2\text{AgBiBr}_6$  perovskite films.

The bandgap of  $\text{Cs}_2\text{AgBiBr}_6$  films was determined by Tauc curve equation.

$$(\alpha h\nu)^{1/n} = A(h\nu - E_g) \quad (1)$$

Where  $\alpha$  represents the absorption coefficient,  $h$  is the Planck constant and  $\nu$  is the incident frequency,  $A$  is a proportional constant [4, 5].

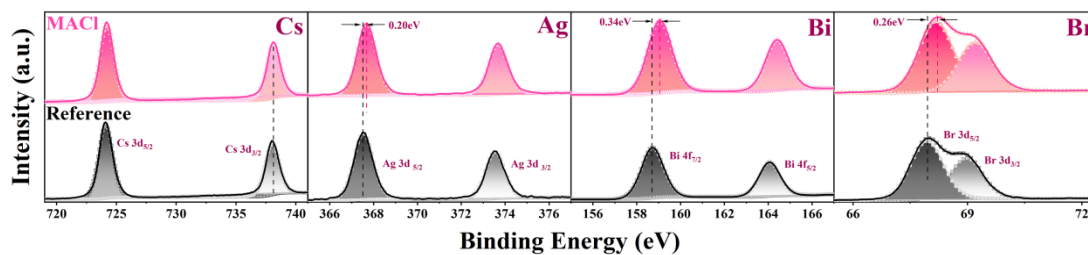

**Fig. S3** XPS spectra of Cs 3d, Ag 3d, Bi 4f and Br 3d in reference films treated and  $\text{Cs}_2\text{AgBiBr}_6$ -MACl films.

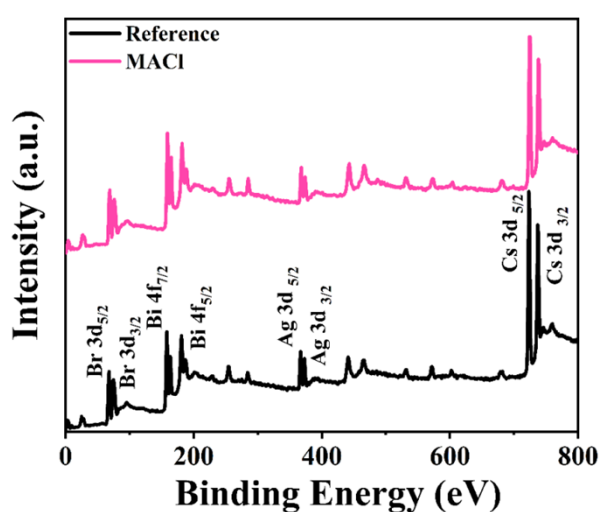

**Fig.S4** Survey X-ray photoelectron spectroscopy (XPS) spectra of the reference and  $\text{Cs}_2\text{AgBiBr}_6$ -MACl.

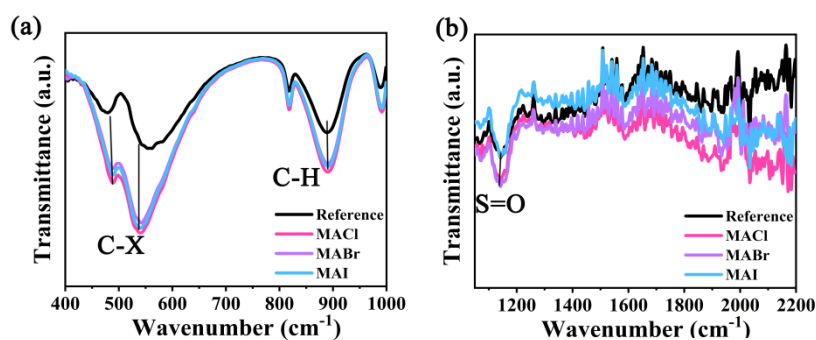

**Fig.S5** Fourier transform infrared spectrometer (FT-IR) spectra of  $\text{Cs}_2\text{AgBiBr}_6$  samples



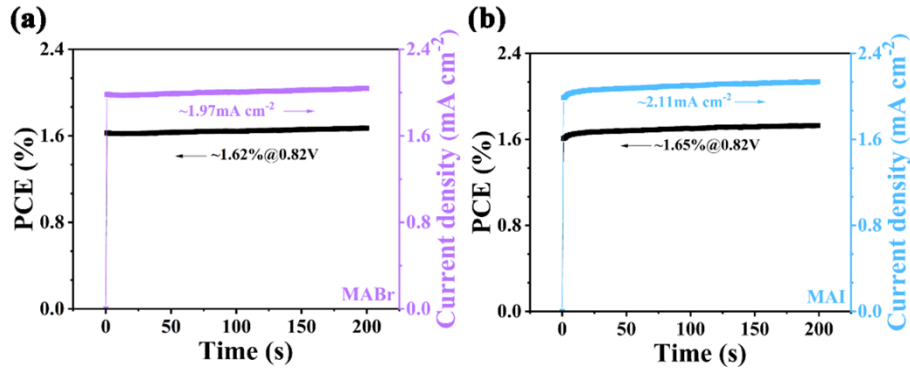

**Fig.S6** Steady-state power outputs at the maximum power point of (a)  $\text{Cs}_2\text{AgBiBr}_6\text{-MABr}$  and (b)  $\text{Cs}_2\text{AgBiBr}_6\text{-MAI}$ .

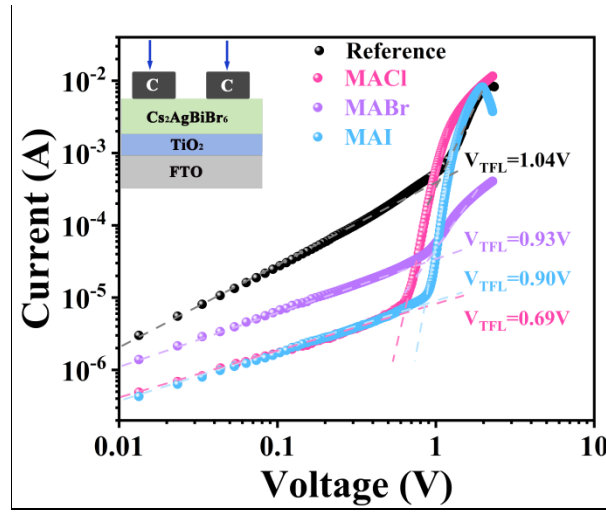

**Fig.S7** Schematic diagram and dark I-V curves of  $\text{Cs}_2\text{AgBiBr}_6$  devices.

The space-charge limited current (SCLC) model was used to calculate the trap density ( $N_{\text{trap}}$ ).

$$N_{t r} \bar{a} \frac{2 \epsilon_0 V_{T F L}}{e L^2} \quad (5)$$

Where  $e$ ,  $L$ ,  $\epsilon$  and  $\epsilon_0$  are the basic charge, the thickness of the active layer, the relative permittivity of  $\text{Cs}_2\text{AgBiBr}_6$  and the vacuum dielectric constant ( $8.8542 \times 10^{-14} \text{ F/cm}$ ), respectively.<sup>[6, 7]</sup> The trap-filled limit voltage ( $V_{\text{TFL}}$ ) was 1.04V, 0.69V, 0.93V and 0.90V, producing  $N_{\text{trap}}$  was  $1.468 \times 10^{15} \text{ cm}^{-3}$ ,  $9.737 \times 10^{14} \text{ cm}^{-3}$ ,  $1.312 \times 10^{15} \text{ cm}^{-3}$  and  $1.27 \times 10^{15} \text{ cm}^{-3}$  for the reference  $\text{Cs}_2\text{AgBiBr}_6$ ,  $\text{Cs}_2\text{AgBiBr}_6\text{-MAI}$ ,  $\text{Cs}_2\text{AgBiBr}_6\text{-MABr}$  and  $\text{Cs}_2\text{AgBiBr}_6\text{-MAI}$  devices, respectively.

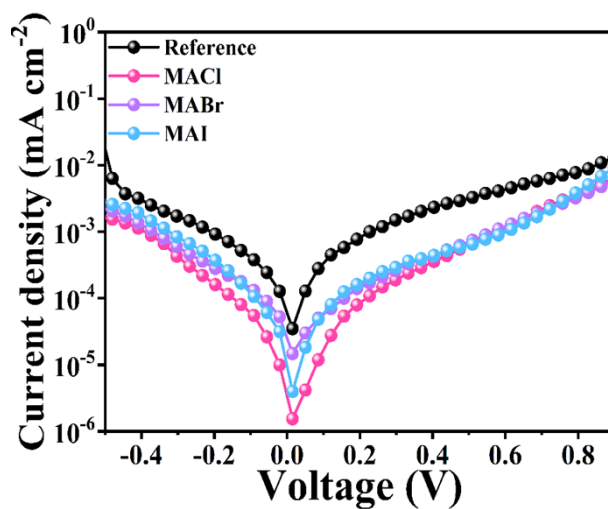

Fig.S8 J-V curves of  $\text{Cs}_2\text{AgBiBr}_6$  PeSCs in dark.

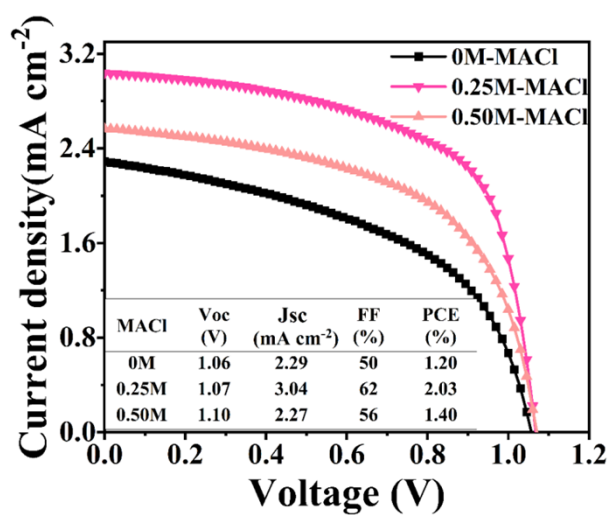

Fig.S9 J-V curves of  $\text{Cs}_2\text{AgBiBr}_6$  devices pre-treated with different concentration MACl.

## References

1. Y. Han, H. Zhao, C. Duan, S. Yang, Z. Yang, Z. Liu and S. Liu, *Adv. Funct. Mater.*, 2020, **30**,

- 1909972.
2. P. Liao, X. Zhao, G. Li, Y. Shen and M. Wang, *Nanomicro. Lett.*, 2018, **10**, 5.
  3. J. Shi, J. Dong, S. Lv, Y. Xu, L. Zhu, J. Xiao, X. Xu, H. Wu, D. Li, Y. Luo and Q. Meng, *Appl. Phys. Lett.*, 2014, **104**, 063901.
  4. B. D. Viezbicke, S. Patel, B. E. Davis and D. P. Birnie, *Phys. Status Solidi B*, 2015, 252, 1700-1710.
  5. P. Hou, W. Yang, N. Wan, Z. Fang, J. Zheng, M. Shang, D. Fu, Z. Yang and W. Yang, *J. Mater. Chem. C*, 2021, 9, 9659-9669.
  6. Z. Shuang, H. Zhou, D. Wu, X. Zhang, B. Xiao, G. Ma, J. Zhang and H. Wang, *Chem. Eng. J.*, 2022, **433**, 063901.
  7. H. Wu, Y. Wang, A. Liu, J. Wang, B. J. Kim, Y. Liu, Y. Fang, X. Zhang, G. Boschloo and E. M. J. Johansson, *Adv. Funct. Mater.*, 2021, 32, 2109402.
